# Supplementary material for: Fabrication of black aluminium thin films by magnetron sputtering
Source: Royal Society of Chemistry journal article supplement (doi:10.1039/d0ra00866d), 2020-01-01
Supplement: d0ra00866d1.pdf [file d0ra00866d1.pdf]

## Supplementary Materials.

### Fabrication of black aluminium thin films by magnetron sputtering

J. More-Chevalier <sup>a\*</sup>, M. Novotný<sup>a</sup>, P. Hruška<sup>a,b</sup>, L. Fekete<sup>a</sup>, P. Fitl<sup>a,c</sup>, J. Bulíř<sup>a</sup>, P. Pokorný<sup>a</sup>, L. Volfová<sup>a</sup>, Š. Havlová<sup>a,c</sup>, M. Vondráček<sup>a</sup>, J. Lančok<sup>a</sup>

<sup>a</sup>Institute of Physics of the Czech Academy of Sciences, Na Slovance 1999/2, 182 21 Prague, Czech Republic.

<sup>b</sup>Charles University, Faculty of Mathematics and Physics, Ke Karlovu 3, 12116 Praha 2, Czech Republic.

<sup>c</sup>Department of Physics and Measurements, University of Chemistry and Technology Prague, Technická 5, 16628 Praha 6, Czech Republic.

\*Corresponding author: [morechevalier@fzu.cz](mailto:morechevalier@fzu.cz)

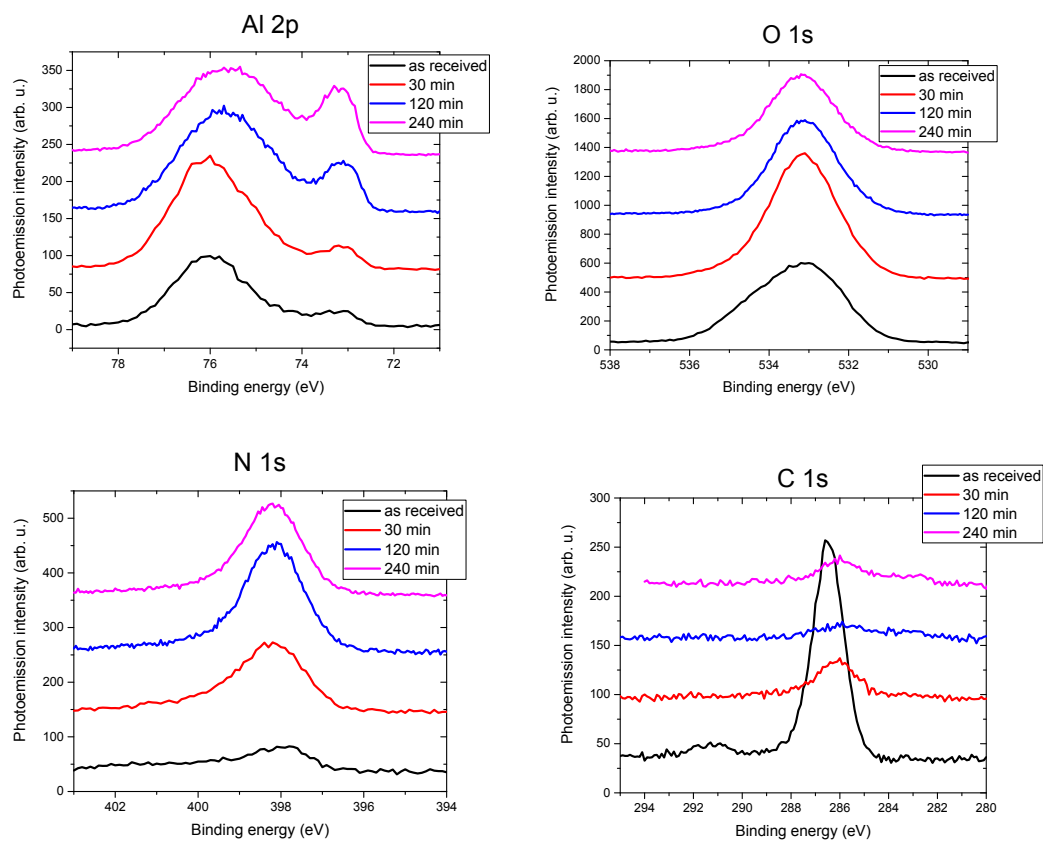

Fig. S 1 XPS spectra of B-Al 6% film a) Al 2p, b) O1s, c) N 1s, d) C 1s. The sample was sputtered with 1 keV Ar<sup>+</sup> ions at a pressure of 2 Pa for 30, 120 and 240 min.
